# Supplementary material
Source: MDPI journal article supplement (https://www.mdpi.com/2072-4292/13/14/2694)
Supplement: s1 [file s1]

Supplementary materials for:

## The surface displacement response of a tropical glacier to intra and inter annual forcing, Cordillera Blanca, Peru

Andrew Kos<sup>1</sup>, Florian Amann<sup>2</sup>, Tazio Strozzi<sup>3</sup>, Julian Osten<sup>2</sup>, Florian Wellmann<sup>4</sup>, Mohammadreza Jalali<sup>2</sup>, Anja Dufresne<sup>2</sup>

<sup>1</sup>Terrasense Switzerland Ltd, Buchs 9470, Switzerland

<sup>2</sup>RWTH University, Chair of Engineering Geology and Hydrogeology, 52062 Aachen, Germany

<sup>3</sup>Gamma Remote Sensing Ltd, Gümliigen 3073, Switzerland

<sup>4</sup>RWTH University, Unit of Computational Geoscience & Reservoir Engineering, 52062 Aachen, Germany

### Content of this file

Figures S1 to S10

(a)

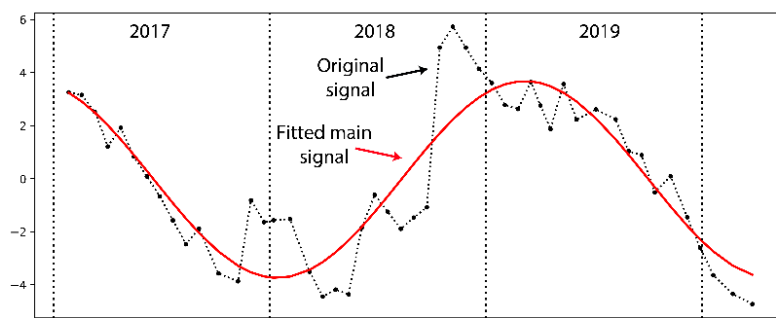

(b)

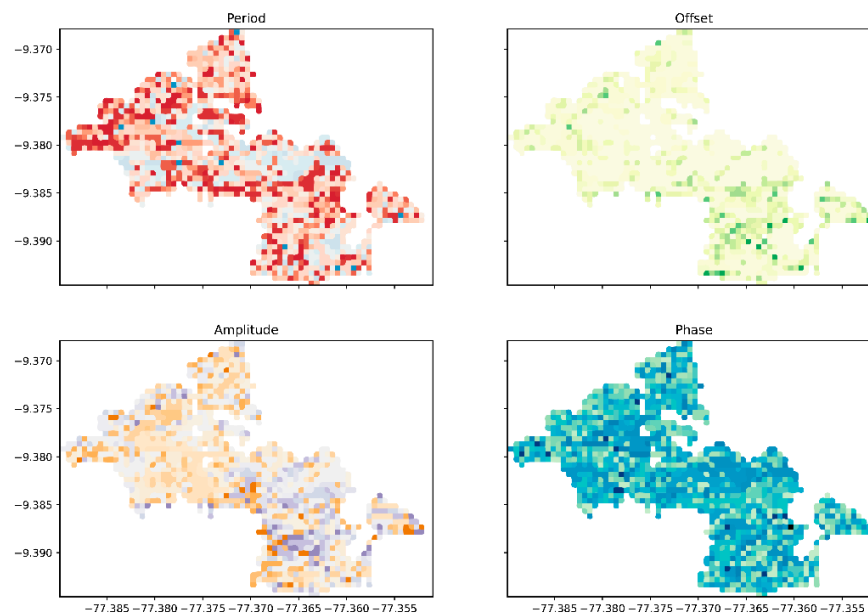

(c)

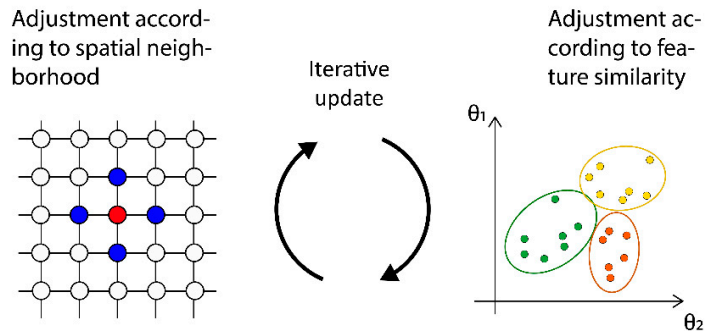

(d)

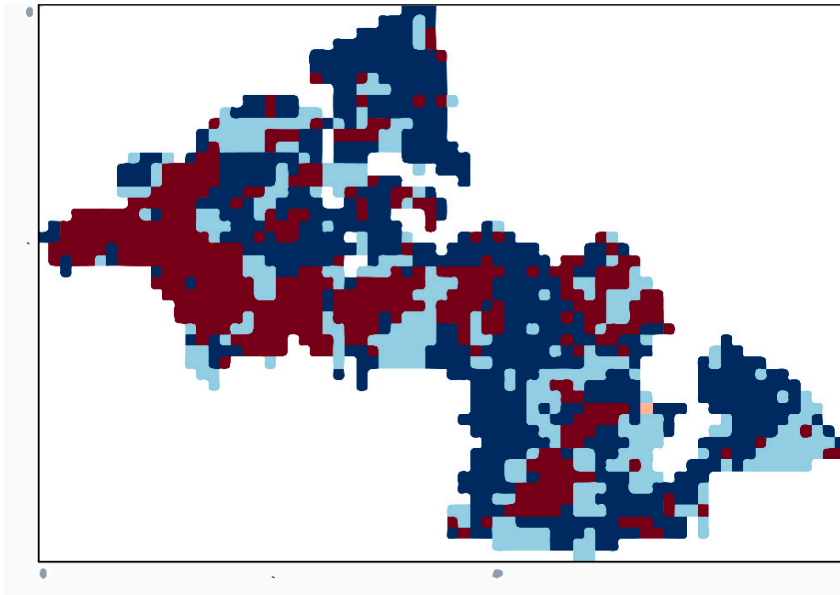

Figure S1: Conceptual representation of the clustering approach: **(a)** step 1, extraction of the dominant signal in the time series; **(b)** step 2, visualization of the spatial distribution of period, offset, amplitude and phase of the dominant signals; **(c)** step 3, schematic representation of the unsupervised machine learning algorithm (HNRFGMM), combining spatial proximity and feature similarity in an iterative Bayesian approach; **(d)** step 4, spatial distribution of cluster results (see Fig. 7c in main text for results within a spatial context).

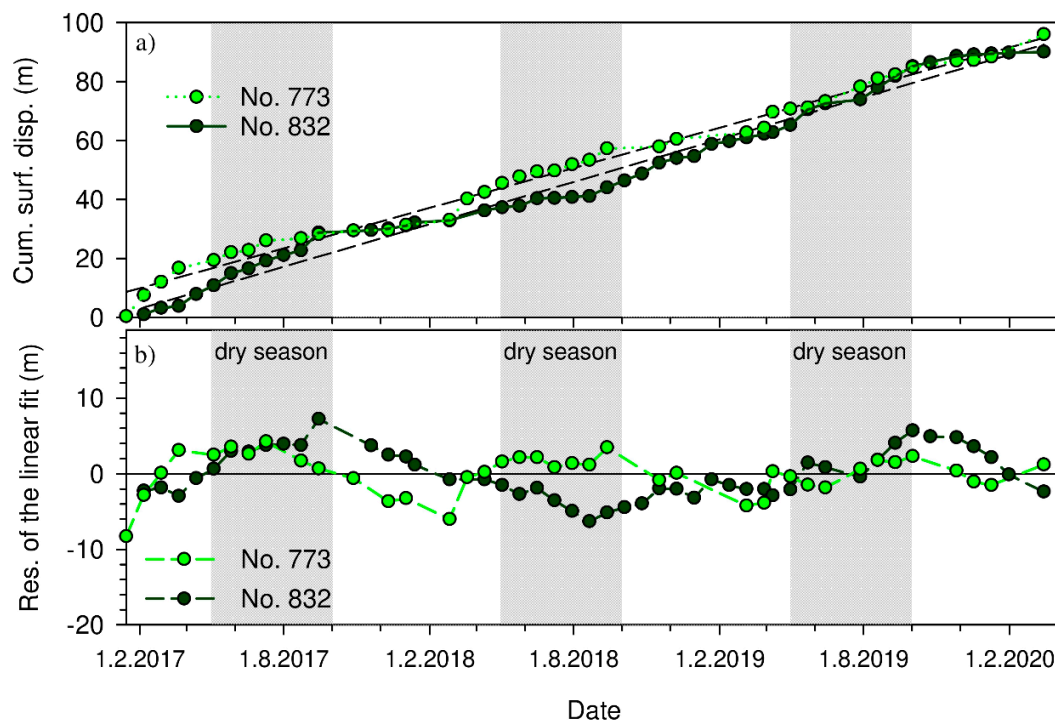

Figure S2: Displacement time series and residuals for selected points in Zone S3 (Figure 1, main text)

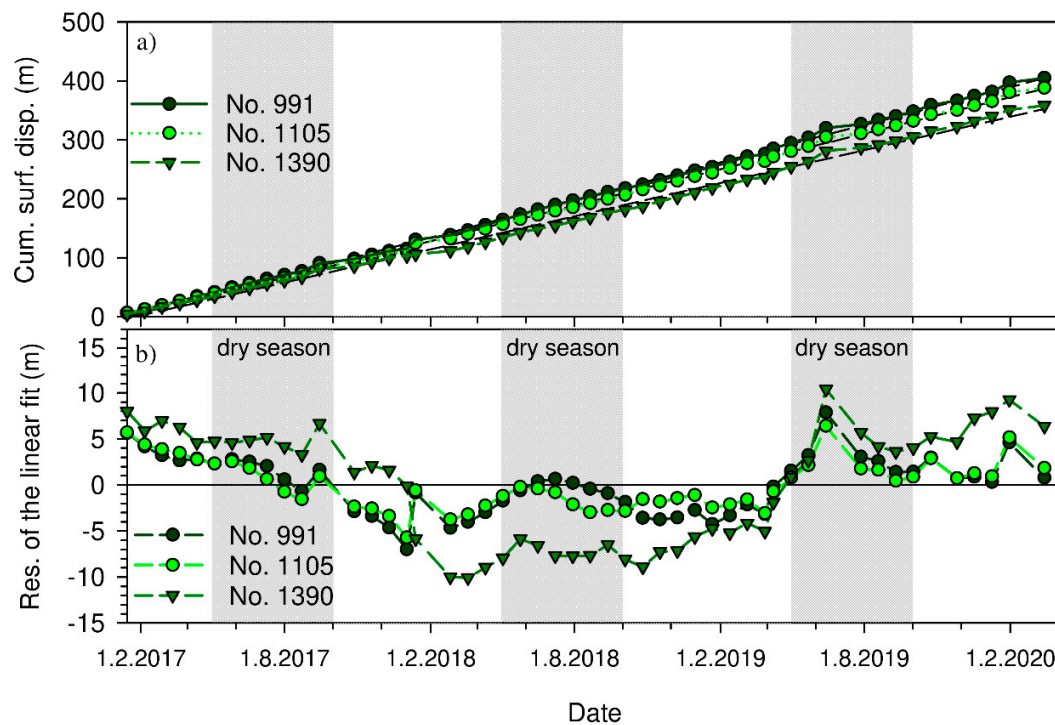

Figure S3: Displacement time series and residuals for selected points in Zone S4a (Figure 1, main text)

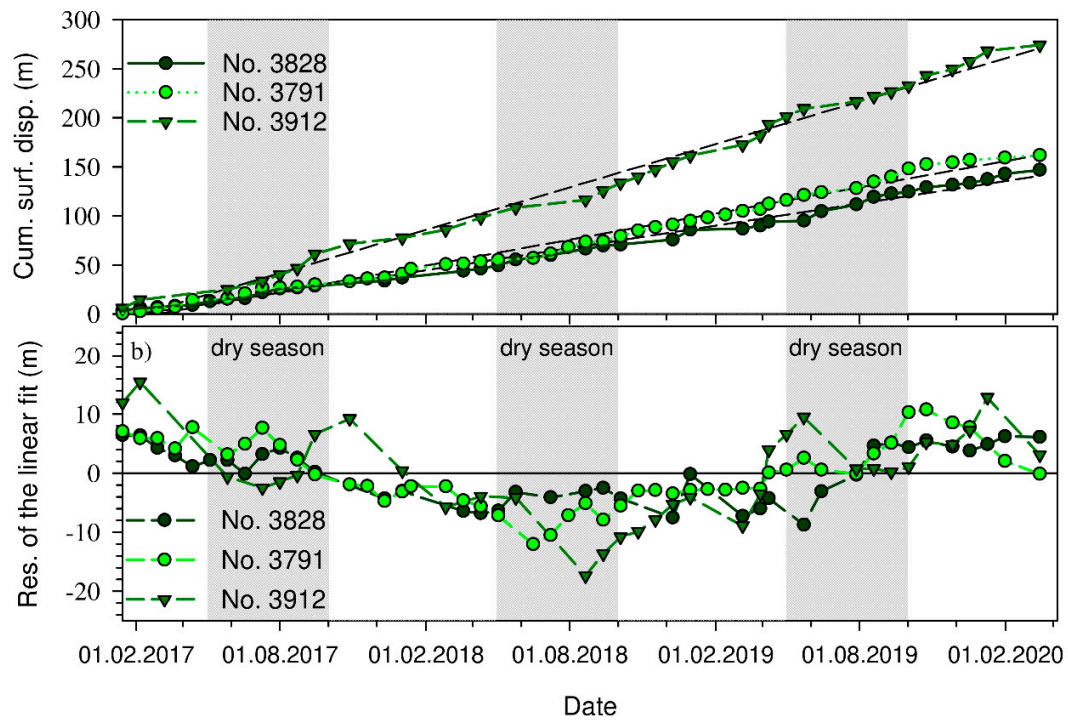

Figure S4: Displacement time series and residuals for selected points in Zone E1 (Figure 1, main text)

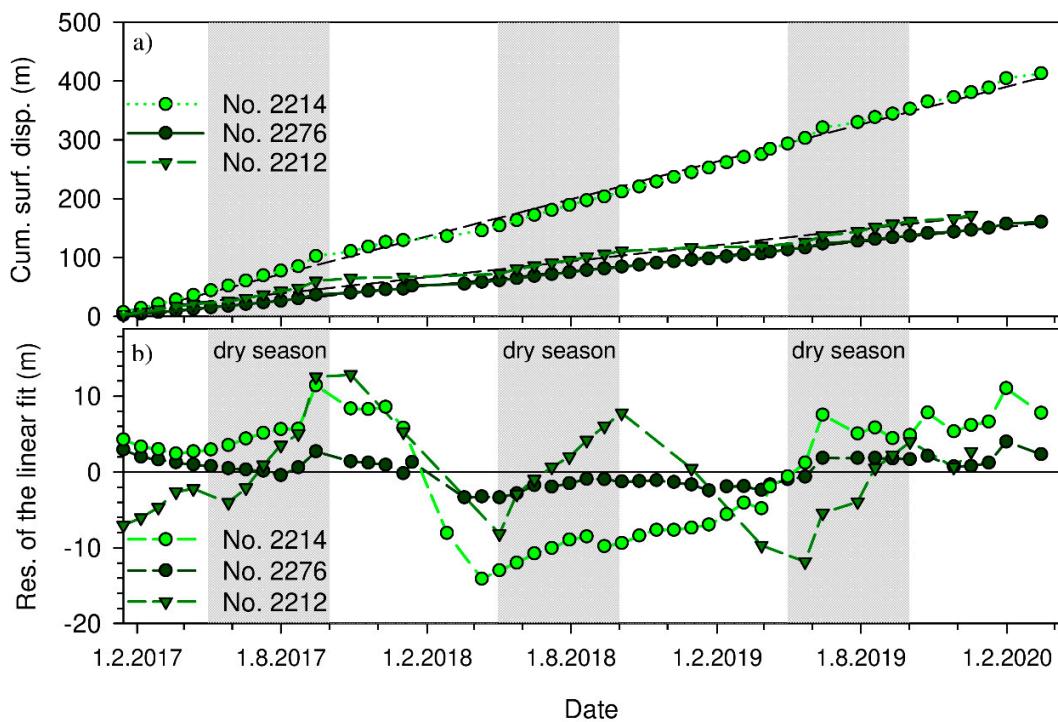

Figure S5: Displacement time series and residuals for selected points in Zone E2 (Figure 1, main text)



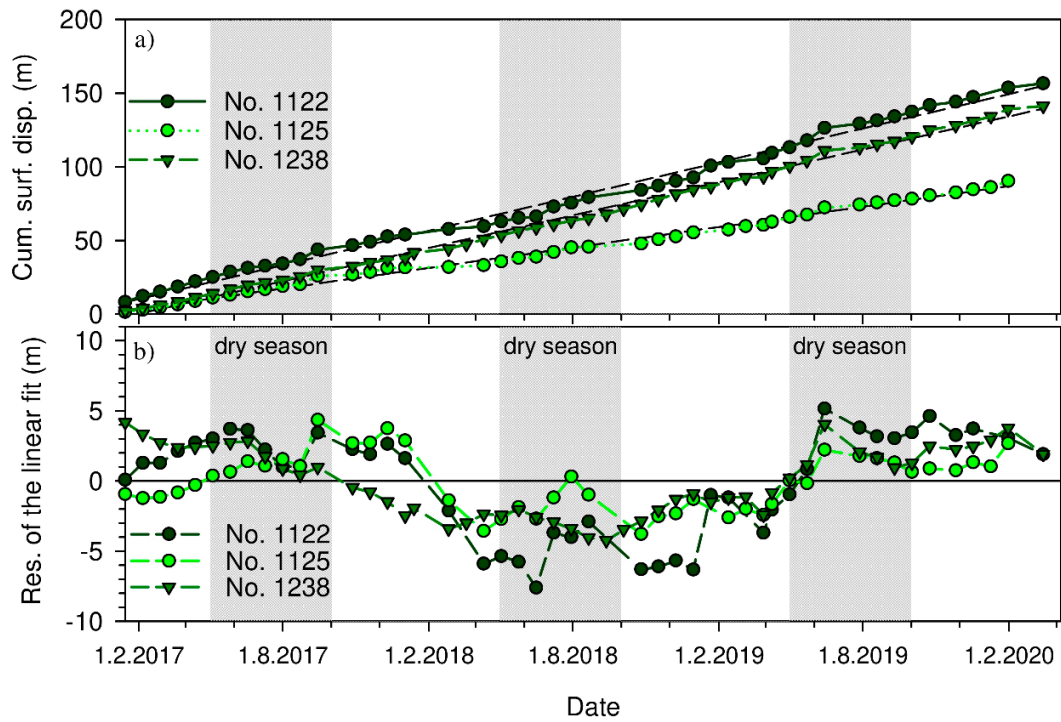

Figure S6: Displacement time series and residuals for selected points in Zone S5 (Figure 1, main text)

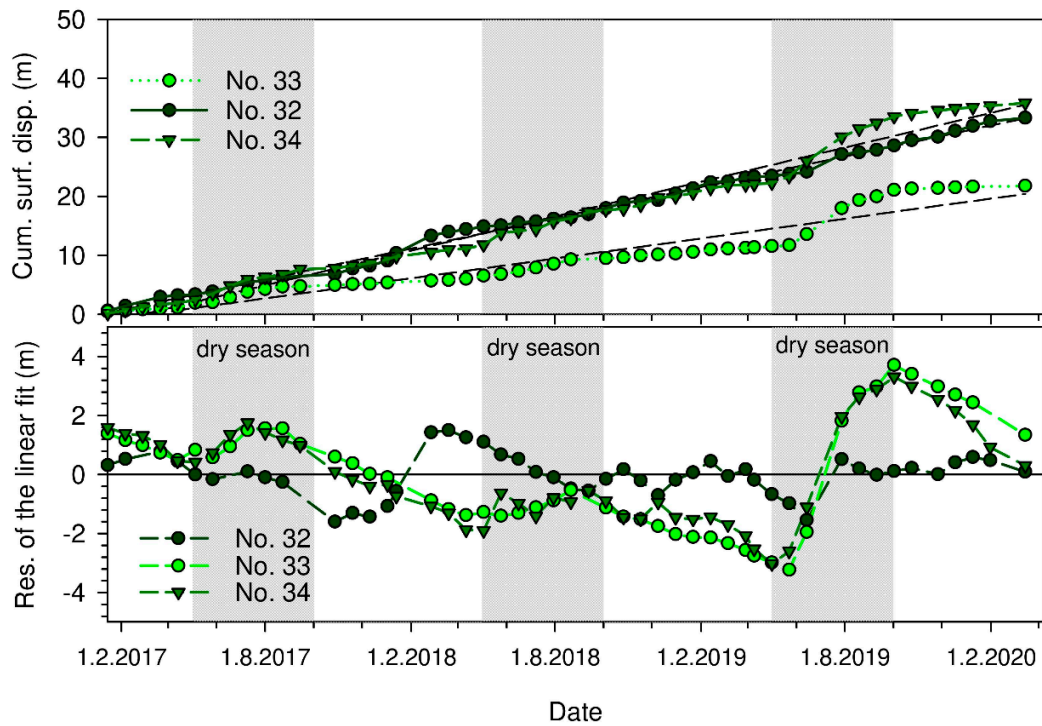

Figure S7: Displacement time series and residuals for selected points in Zone S1 (Figure 1, main text)

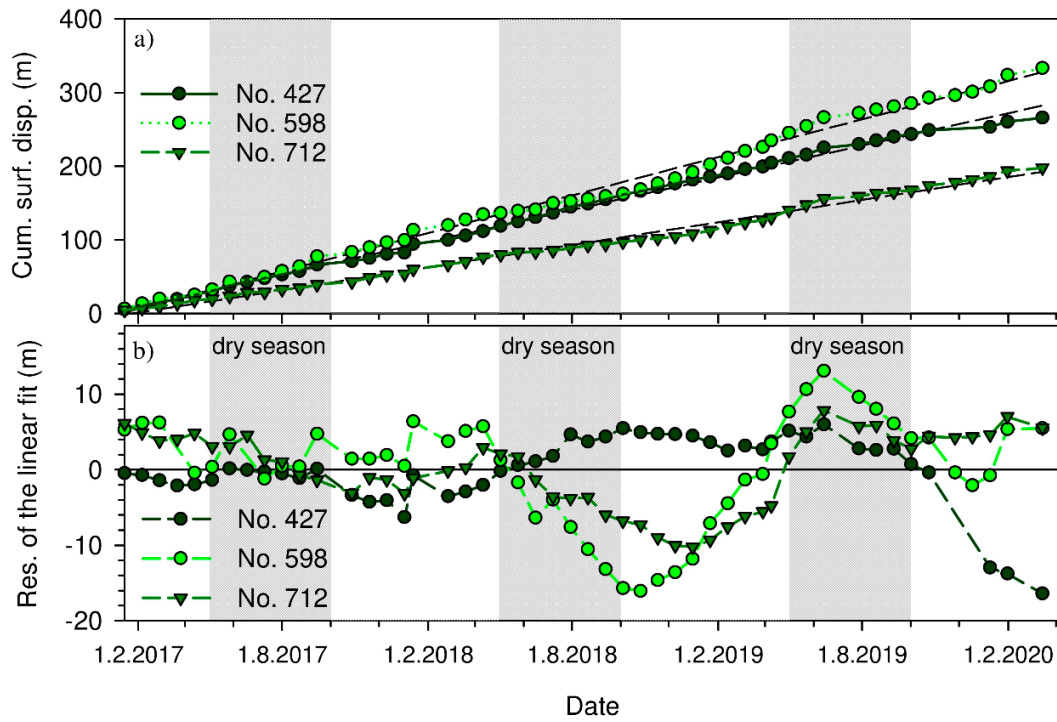

Figure S8: Displacement time series and residuals for selected points in Zone S2 (Figure 1, main text)

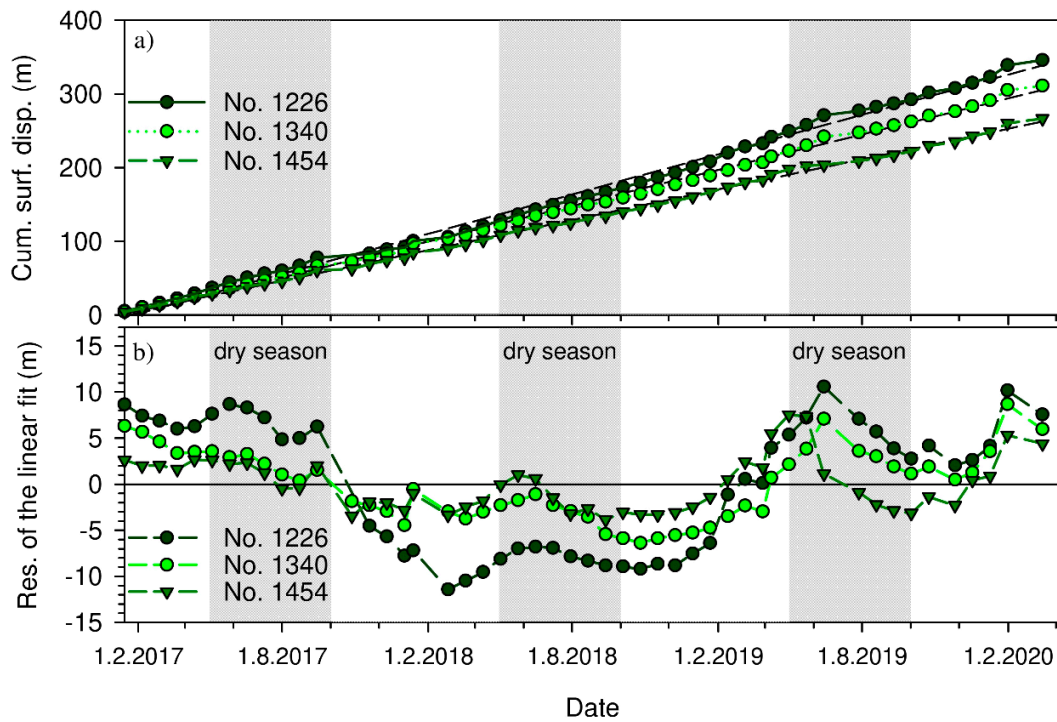

Figure S9: Displacement time series and residuals for selected points in Zone S4b (Figure 1, main text)

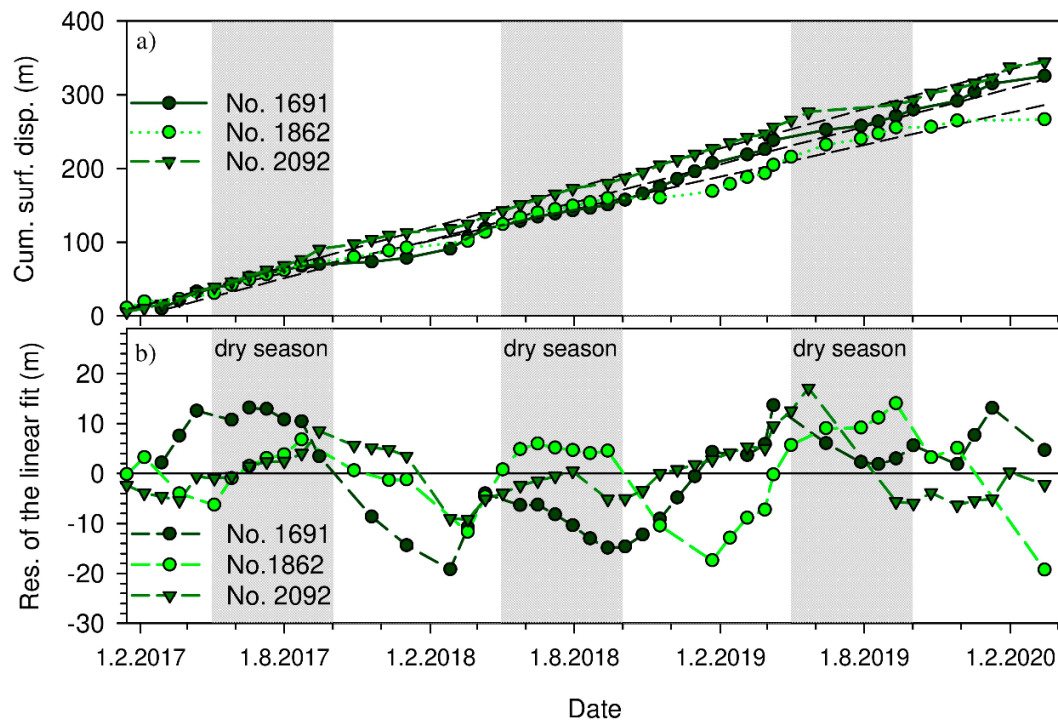

Figure S10: Displacement time series and residuals for selected points in Zone E3 (Figure 1, main text)
